# Supplementary material for: Autophagy-deficient Arabidopsis mutant atg5, which shows ultraviolet-B sensitivity, cannot remove ultraviolet-B-induced fragmented mitochondria
Source: Royal Society of Chemistry journal article supplement (doi:10.1039/c9pp00479c), 2020-11-25
Supplement: c9pp00479c1.pdf [file c9pp00479c1.pdf]

## Supplementary Information

### Materials and methods

#### Southern blot analysis

Southern blot analysis of organelle-specific DNA repair was based on the quantitative comparison of the intensity, as determined by densitometry analysis, of T4 endonuclease V-treated and untreated DNA.<sup>1</sup> T4 endonuclease V cleaves single DNA strands at CPD sites. Genomic DNA was isolated from shoots of irradiated or non-irradiated seedlings as described previously.<sup>2</sup> Genomic DNA was digested with *Bam*HI. The digested DNA was divided into two equal aliquots; one aliquot was treated with T4 endonuclease V, and the other was left untreated. The samples were resolved by alkaline agarose gel electrophoresis, the DNA was blotted onto a nylon membrane as described previously.<sup>3</sup>

To generate probes for Southern blot analysis, a mitochondrial-specific gene (*COX1*: ATMG01360) and a nuclear-specific gene (*PHT2;1*: AT3G26570) were amplified using gene-specific primers (Supplementary Table 2). The amplified fragments were subcloned into the pGEM-T easy vector (Promega), and the sequences were confirmed. The digested inserts were labelled with [ $\alpha$ -<sup>32</sup>P] dCTP and hybridized individually to a nylon membrane as described previously.<sup>3</sup> Data are presented as the ratio of [(intensity of untreated DNA) – (intensity of T4 endonuclease V-treated DNA)] to intensity of untreated DNA [% fragments with enzyme-sensitive sites (ESS)].

#### Carbonyl cyanide m-chlorophenyl hydrazone treatment

Whole plants of transgenic *Arabidopsis* lines with MT-GFP, including roots, were pulled out from the soil. A 10 mM MES-NaOH (pH 5.5) solution with or without 10  $\mu$ M CCCP was infiltrated into leaves using a 1-ml syringe. The seedlings were immersed in the same solutions with filter paper laid on top to keep them submerged, and were then returned to the growth chamber for 6 h. The same amount of DMSO as CCCP was added to the control. The mesophyll cells in the area infiltrated with CCCP were observed by LSCM.

#### Monitoring of autophagic flux

28 The mitochondria-targeted yellow fluorescent protein (MT-YFP) driven by Pro35S was introduced  
29 into *Arabidopsis thaliana* ecotype Columbia (WT). The transgenic *Arabidopsis* line harboring MT-  
30 YFP (MtY-WT) was grown vertically on ½-MS medium agar plates in chambers at 23°C under a 16-  
31 h light (6 a.m. to 10 p.m.)/8-h dark (10 p.m. to 6 a.m.) photoperiod under white fluorescent lamps (140  
32  $\mu\text{mol m}^{-2} \text{s}^{-1}$ ). Fourteen-day-old seedlings including the roots were treated with CCCP or UV-B  
33 irradiation as described below. The fourteen-day-old seedlings were immersed in 10 mM MES-NaOH  
34 (pH 5.5) solution with or without 10  $\mu\text{M}$  CCCP, and then returned to the growth chamber for 6 h. The  
35 non-treated or treated seedlings were immersed in 10 mM MES-NaOH (pH 5.5) containing 0.2  $\mu\text{M}$   
36 DALGreen (Dojindo) and incubated in light-tight box for 4 h at 23°C. Seedlings were then washed  
37 three times with 10 mM MES-NaOH (pH 5.5) and observed by LSCM.<sup>4</sup>.

38 Fourteen-day-old seedlings including the roots were irradiated for 1 h with narrowband light with  
39 UV-B (1.5  $\text{W m}^{-2}$ ) supplied by a xenon light source [MAX-303 (UV-VIS); Asahi Spectra Co., Ltd.]  
40 filtered through a 280 nm band pass filter (LX0280; Asahi Spectra Co., Ltd.). After UV-B irradiation,  
41 the irradiated seedlings were incubated in the growth chamber for 5 h, and then immersed in 10 mM  
42 MES-NaOH (pH 5.5) containing 0.2  $\mu\text{M}$  DALGreen and incubated in light-tight box for 4 h at 23°C.  
43 Seedlings were then washed three times with 10 mM MES-NaOH (pH 5.5) and observed by LSCM.<sup>4</sup>.  
44 Images of the late elongation zone and neighboring cells in the differentiation zone of the roots were  
45 acquired. Fluorescence images of DALGreen (excitation 405 nm, emission 500–550 nm), and of YFP  
46 (excitation 488 nm, emission 500–550 nm) were obtained.

47

## 48 **References**

- 49 1. J. -J. Chen, C. -Z. Jiang and A. B. Britt, A.B. Little or no repair of cyclobutyl pyrimidine dimers is  
50 observed in the organellar genomes of the young *Arabidopsis* seedlings. *Plant Physiol.*, 1996, **111**,  
51 19–25.
- 52 2. M. Teranishi, Y. Iwamatsu, J. Hidema and T. Kumagai, Ultraviolet-B sensitivities in Japanese  
53 lowland rice cultivars: cyclobutane pyrimidine dimer photolyase activity and gene mutation. *Plant*  
54 *Cell Physiol.*, 2004, **45**, 1845-1856.

- 55 3. M. Takahashi, M. Teranishi, H. Ishida, J. Kawasaki, A. Takeuchi, T. Yamaya, M. Watanabe, A.  
56 Makino and J. Hidema, Cyclobutane pyrimidine dimer (CPD) photolyase repairs ultraviolet-B-  
57 induced CPDs in rice chloroplast and mitochondrial DNA. *Plant J.*, 2011, **66**, 433-442.
- 58 4. H. Iwashita, S. Torii, N. Nagahoro, M. Ishiyama, K. Shioji, K. Sasamoto, S. Shimizu and K. Okuma,  
59 Live cell imaging of mitochondria autophagy with a novel fluorescent small molecule. *ACS Chem.*  
60 *Biol.*, 2017, **12**, 2546-2551.

61

62

### Supplementary figure legends

63 **Supplementary Figure 1. UV-B-induced cell death in leaf mesophyll of *Arabidopsis* lines.** UV-B-  
64 induced cell death in chloroplast stroma-targeted (CT)-GFP-expressing transgenic lines of wild-type  
65 Columbia (WT), *atg5* and *phr1* mutants, *atg5 phr1* double mutant, and AtPHR1-overexpressing  
66 transgenic (AtPHR1ox) seedlings as observed by LSCM at 2 d after UV-B exposure (280 nm, 0.5 or  
67 1.5 W m<sup>-2</sup> for 1 h). Green, GFP; magenta, chlorophyll. Arrows indicate dead cells (entirely green due  
68 to distribution of GFP throughout cells after vacuolar degradation). Scale bars, 20 μm. Proportion of  
69 dead cells out of total cells per fixed area (see Materials and Methods) is shown in Fig. 1c.

70

71 **Supplementary Figure 2. Repair of CPDs in mitochondrial DNA induced by UV-B exposure by**  
72 **CPD photolyase, PHR1.** Fourteen-day-seedlings of WT, *atg5*, and *phr1* were non-irradiated (No UV-  
73 B) or exposed to UV-B (1.5 W m<sup>-2</sup> for 1 h) (UV-B). UV-B-irradiated seedlings were returned to the  
74 growth chamber with white light for repair of CPDs (UV-B + 10 h and UV-B + 24 h). To measure the  
75 level of CPD photolyase-independent repair, UV-B-irradiated seedlings were placed in a light-tight  
76 box and returned to the growth chamber (UV-B + 24 h Dark). Genomic DNA was isolated and digested  
77 with restriction enzymes, then digested DNA was incubated with (+) or without (-) T4 endonuclease  
78 V. The membrane was incubated with <sup>32</sup>P-labeled probes for mitochondrial-encoded *COXI* and  
79 nuclear-encoded *PHT2;1*. Percentage (%) fragments with enzyme-sensitive sites were calculated as  
80 the ratio of intensity of T4 endonuclease V-treated to the intensity of untreated DNA. Data are means ±  
81 SE. Asterisks indicate significant difference (\**p* < 0.05). ns., not significant.

82

83 **Supplementary Figure 3. Induction of mitochondrial fragmentation by carbonyl cyanide m-**  
84 **chlorophenyl hydrazone.** (a) Mt-WT and Mt-*atg5* were non-treated (control) or treated with 10  $\mu$ M  
85 carbonyl cyanide m-chlorophenyl hydrazone (CCCP), a mitochondrial uncoupler that results in rapid  
86 and dramatic fragmentation of mitochondria. Laser scanning confocal microscopy images were taken  
87 at 6 h after treatment. Magenta, chlorophyll; green, mitochondria. Images are representative of three  
88 independent plants. Scale bars, 20  $\mu$ m. (b) At 6 h after treatment, the number of mitochondria per cell  
89 was determined by Imaris software (number of MT-GFP dots within each cell in a fixed area; see  
90 Materials and Methods) ( $n = 6$  leaves). (c) The volume of each mitochondrion was estimated by 3D  
91 conversion of MT-GFP dots by Imaris software ( $n = 6$  leaves). Data are means  $\pm$  SE. Asterisks indicate  
92 a significant difference based on one-way ANOVA (\*\* $p < 0.01$ , \*\*\* $p < 0.001$ ). ns., not significant.

93

94 **Supplementary Figure 4. More effective removal of CPDs from mitochondrial DNA in AtPHR1-**  
95 **overexpressing line (AtPHR1ox).** Transgenic plant stably over-expressing *AtPHR1* was non-  
96 irradiated (No UV-B) or exposed to UV-B (1.5 W m<sup>-2</sup> for 1 h) (UV-B). UV-B-irradiated seedlings  
97 were returned to the growth chamber with white light for repairing CPD (UV-B + 10 h and UV-B +  
98 24 h). To measure the level of CPD photolyase-independent repair, UV-B-irradiated seedlings were  
99 placed in a light-tight box and returned to the growth chamber (UV-B + 24 h Dark). Genomic DNA  
100 was isolated and digested with restriction enzymes, then digested DNA was incubated with (+) or  
101 without (-) T4 endonuclease V. The membrane was incubated with <sup>32</sup>P-labeled probes for  
102 mitochondrial-encoded *COX1* and nuclear-encoded *PHT2;1*. Percentage (%) fragments with enzyme-  
103 sensitive sites was calculated as the ratio of intensity of T4 endonuclease V-treated to the intensity of  
104 untreated DNA. Data are means  $\pm$  SE. Asterisks indicate significant difference (\* $p < 0.05$ ). ns., not  
105 significant. Data for WT are same as in Supplementary Figure 2.

106

107 **Supplementary Figure 5. Comparison of UV-B-induced mitochondrial deactivation between**  
108 **WT and CPD photolyase-overexpressing AtPHRox plants.** (a) Transgenic plants stably over-

109 expressing mitochondrial matrix MT-GFP (Mt-WT and Mt-AtPHR1ox) were non-irradiated or  
110 exposed to UV-B (1.5 W m<sup>-2</sup> for 1 h), then co-stained 24 h later with mitochondrial membrane  
111 potential indicator TMRE. Laser-scanning confocal microscope images of leaf mesophyll cells are  
112 shown. Images are representative of three independent experiments. Green, mitochondria; magenta,  
113 chlorophyll; orange, active mitochondria. Scale bars, 10 μm. (b) Numbers of mitochondria (GFP dots)  
114 or active mitochondria (TMRE-signal dots) per cell as counted with Imaris software (number of  
115 inactive mitochondria = total number of mitochondria – number of active mitochondria). Images from  
116 three replicates were used for calculations. Data represent means ± SE ( $n \geq 20$  cells). Asterisks denote  
117 significant differences based on two-way ANOVA (\* $p < 0.05$ , \*\*\* $p < 0.001$ ). ns, not significant.

118

119 **Supplementary Figure 6. Autophagosome activity in *Arabidopsis* plants treated with CCCP or**  
120 **exposed to UV-B radiation.** Transgenic plants stably over-expressing mitochondria-targeted YFP  
121 (MtY-WT) were non-treated (No Treatment) or treated with CCCP (10 μM for 6 h) (CCCP Treatment)  
122 in the growth chamber, then stained with DALGreen 4 h later. MtY-WT were exposed to UV-B (1.5  
123 W m<sup>-2</sup> for 1 h). After UV-B irradiation, the irradiated seedlings were incubated in the growth chamber  
124 for 5 h, and then stained with DALGreen 4 h later (UV-B). Laser - scanning confocal microscope  
125 images of root cells. Fluorescence images of DALGreen (excitation 405 nm, emission 500–550 nm),  
126 and of YFP (excitation 488 nm, emission 500–550 nm) were obtained. Images are representative of  
127 three independent experiments. Yellow, mitochondria; Green, active autophagosome. Scale bars,  
128 20 μm.

129

130
